# Supplementary material
Source: Springer Nature journal article supplement (https://www.springermedizin.de/resource/supplementary/12889_2009_2397_MOESM1_ESM.pdf/9485682)

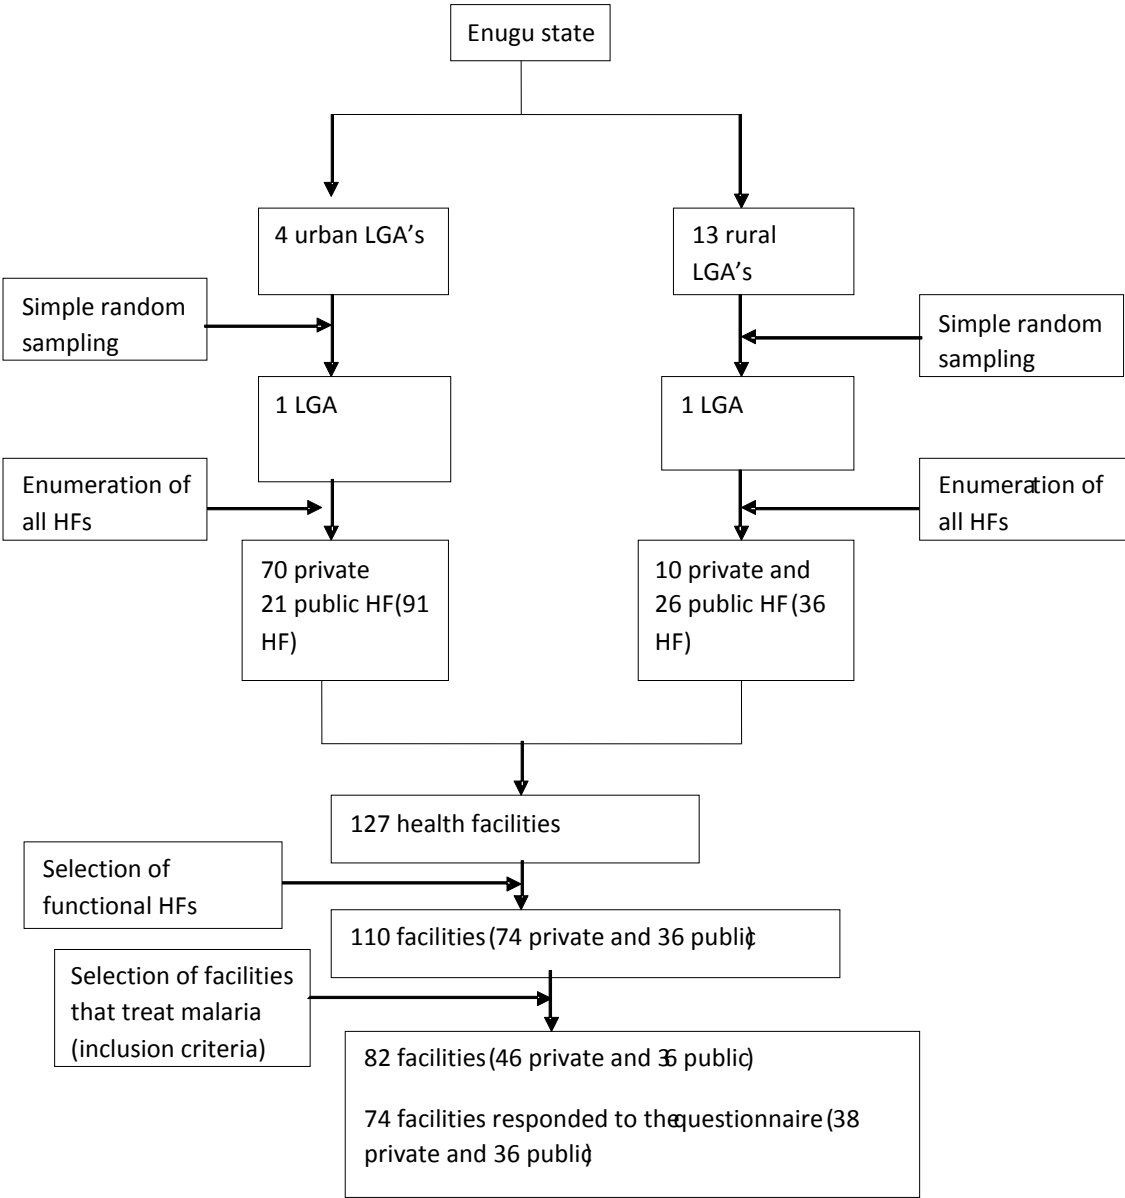

Supplement: MOESM1 [file 9485682]
